1 **Laboratory Validation of a Clinical Metagenomic Sequencing Assay for Pathogen**

2 **Detection in Cerebrospinal Fluid**

3 Miller S<sup>#1,2</sup>, Naccache SN<sup>1,2,3#</sup>, Samayoa E<sup>1</sup>, Messacar K<sup>4</sup>, Arevalo S<sup>1,2</sup>, Federman S<sup>1,2</sup>, Stryke  
4 D<sup>1,2</sup>, Pham E<sup>1</sup>, Fung B<sup>1</sup>, Bolosky WJ<sup>5</sup>, Ingebrigtsen D<sup>1</sup>, Lorizio W<sup>1</sup>, Paff SM<sup>1</sup>, Leake JA<sup>6</sup>, Pesano  
5 R<sup>6</sup>, DeBiasi RL<sup>7,8</sup>, Dominguez SR<sup>4</sup>, and CY Chiu<sup>1,2,9\*</sup>

6  
7 <sup>1</sup>Department of Laboratory Medicine, University of California, San Francisco, San Francisco,  
8 CA, USA

9 <sup>2</sup>UCSF-Abbott Viral Diagnostics and Discovery Center, San Francisco, CA, USA

10 <sup>3</sup>Department of Pathology and Laboratory Medicine, Children's Hospital Los Angeles, Los  
11 Angeles, California, USA

12 <sup>4</sup>Department of Pediatrics, Children's Hospital Colorado and University of Colorado School of  
13 Medicine, Aurora, CO, USA

14 <sup>5</sup>Microsoft Research, Redmond, WA, USA.

15 <sup>6</sup>Quest Diagnostics Nichols Institute, San Juan Capistrano, CA, USA.

16 <sup>7</sup>Department of Pediatrics, Division of Pediatric Infectious Diseases, Children's National Health  
17 System, Washington, DC, USA

18 <sup>8</sup>Department of Pediatrics, Microbiology, Immunology, and Tropical Medicine, The George  
19 Washington University School of Medicine, Washington, D.C., USA

20 <sup>9</sup>Department of Medicine, Division of Infectious Diseases, University of California, San  
21 Francisco, San Francisco, CA USA

22

23 #These authors contributed equally to the manuscript.

24

25 \*Correspondence to:

26 Charles Chiu

27 Department of Laboratory Medicine and Medicine, Division of Infectious Diseases

28 University of California, San Francisco, San Francisco, CA

29 e-mail: [charles.chiu@ucsf.edu](mailto:charles.chiu@ucsf.edu)

30 tel: (415) 514-8129

31

32 **RUNNING TITLE:** Clinical mNGS Assay for Neurological Infections

33

34 **KEYWORDS:** metagenomic next-generation sequencing, clinical assay validation, SURPI+  
35 bioinformatics pipeline, diagnosis of neurological infections, meningitis and endophthalmitis

36 **ABSTRACT**

37 Metagenomic next-generation sequencing (mNGS) for pan-pathogen detection has been  
38 successfully tested in proof-of-concept case studies in patients with acute illness of unknown  
39 etiology, but to date has been largely confined to research settings. Here we developed and  
40 validated an mNGS assay for diagnosis of infectious causes of meningitis and encephalitis from  
41 cerebrospinal fluid (CSF) in a licensed clinical laboratory. A clinical bioinformatics pipeline,  
42 SURPI+, was developed to rapidly analyze mNGS data, automatically report detected  
43 pathogens, and provide a graphical user interface for evaluating and interpreting results. We  
44 established quality metrics, threshold values, and limits of detection of between 0.16 – 313  
45 genomic copies or colony forming units per milliliter for each representative organism type.  
46 Gross hemolysis and excess host nucleic acid reduced assay sensitivity; however, a spiked  
47 phage used as an internal control was a reliable indicator of sensitivity loss. Diagnostic test  
48 accuracy was evaluated by blinded mNGS testing of 95 patient samples, revealing 73%  
49 sensitivity and 99% specificity compared to original clinical test results, with 81% positive  
50 percent agreement and 99% negative percent agreement after discrepancy analysis.  
51 Subsequent mNGS challenge testing of 20 positive CSF samples prospectively collected from a  
52 cohort of pediatric patients hospitalized with meningitis, myelitis, and/or encephalitis showed  
53 92% sensitivity and 96% specificity relative to conventional microbiological testing of CSF in  
54 identifying the causative pathogen. These results demonstrate the analytic performance of a  
55 laboratory-validated mNGS assay for pan-pathogen detection, to be used clinically for diagnosis  
56 of neurological infections from CSF.

57

58

## 59 INTRODUCTION

60 Metagenomic next-generation sequencing (mNGS) provides a comprehensive method  
61 by which nearly all potential pathogens – viruses, bacteria, fungi, and parasites – can be  
62 accurately identified in a single assay (Goldberg et al. 2015; Chiu and Miller 2016). This  
63 approach is attractive for diagnosis of infectious diseases, as pathogens that cause an  
64 infectious syndrome commonly have non-specific, overlapping clinical presentations  
65 (Washington 1996). Recent advances in sequencing technology and the development of rapid  
66 bioinformatics pipelines have enabled mNGS testing to be performed within a clinically  
67 actionable time frame (Cazanave et al. 2013; Naccache et al. 2014; Wilson et al. 2014;  
68 Fremont et al. 2015; Greninger et al. 2015; Naccache et al. 2015; Salzberg et al. 2016;  
69 Mongkolrattanothai et al. 2017; Parize et al. 2017; Schlaberg et al. 2017b). However, numerous  
70 challenges remain with migrating mNGS testing into the clinical microbiology laboratory. These  
71 include (1) lack of an established blueprint for mNGS clinical validation, (2) difficulty in  
72 discriminating pathogens from colonizing microorganisms or contaminants, (3) paucity of  
73 bioinformatics software customized for clinical diagnostic use, (4) concern over quality and  
74 comprehensiveness of available reference databases, and (5) requirement for regulatory  
75 compliance inherent to patient diagnostic testing in a CLIA (Clinical Laboratory Improvement  
76 Amendments) environment.

77 Acute neurological illnesses such as meningitis and encephalitis are devastating  
78 syndromes, remaining undiagnosed in a majority of cases (Glaser et al. 2003; Glaser et al.  
79 2006; Granerod et al. 2010). The diagnostic workup for many patients requires extensive, and  
80 often negative, serial testing that typically utilizes a combination of culture, antigen, serologic,  
81 and molecular methods, resulting in delayed or missed diagnoses and increased costs. Given  
82 the high burden of encephalitis-associated hospitalizations in the United States (Khetsuriani et

83 al. 2002), there is a large unmet clinical need for better and more timely diagnostics for this  
84 syndrome, both to identify and to exclude infectious etiologies.

85 Here we present the development and validation of an mNGS assay for comprehensive  
86 diagnosis of infectious causes of meningitis and encephalitis from CSF, expanding on summary  
87 data presented in a previously published review (Schlaberg et al. 2017a). The analytic  
88 performance of the mNGS assay was compared to results from conventional clinical  
89 microbiological testing performed in hospital or commercial diagnostic laboratories. We also  
90 tested the assay by blinded analysis of a challenge set of 20 CSF samples prospectively  
91 collected from patients with diagnosed neurological infections at a single pediatric tertiary care  
92 hospital.

93

## 94 **METHODS**

95

### 96 **mNGS Assay**

97 The processing and analysis workflow for the mNGS assay was performed as follows  
98 (**Figure 1**), with a more detailed description provided in the **Supplemental Methods**. Briefly,  
99 each CSF sample was first subjected to bead-beating to lyse organisms (**Figure 1A**), followed  
100 by addition (“spiking”) of DNA T1 and RNA M2 bacteriophages as an internal control (IC). Total  
101 nucleic acid was then extracted and split into 2 aliquots for construction of separate DNA and  
102 RNA libraries. Microbial sequences were enriched by antibody-based removal of methylated  
103 host DNA (for DNA libraries) or DNase treatment (for RNA libraries), followed by transposon-  
104 based library construction (**Figure 1B**). Each sequencing run on an Illumina HiSeq instrument  
105 included up to 8 samples, along with a negative “no template” control (NTC) consisting of elution  
106 buffer, intended to allow for sensitive detection of contamination, and a positive control (PC)  
107 consisting of a mixture of 7 representative organisms (RNA virus, DNA virus, Gram-positive

108 bacterium, Gram-negative bacterium, fungus, mold, and parasite). Some of the early  
109 sequencing data used for validation was generated on an Illumina MiSeq instrument. Sequence  
110 analysis (**Figure 1C**) using the SURPI+ computational pipeline (Naccache et al. 2014) consisted  
111 of (1) pre-processing for trimming of adapters and removal of low-complexity and low-quality  
112 reads, (2) human host background subtraction, (3) alignment to the National Center for  
113 Biotechnology Information (NCBI) GenBank NT (nucleotide) reference database for microbial  
114 identification, (4) taxonomic classification of aligned reads, and (5) visualization and  
115 interpretation of sequencing data. Receiver-operator curve (ROC) analyses were performed to  
116 determine optimal threshold values for organism detection based on mNGS data output. Each  
117 mNGS run was analyzed by experienced laboratory physicians (SM and CYC), and results were  
118 generated for 5 categories per sample (RNA virus, DNA virus, bacteria, fungi and parasite). Run  
119 quality control (QC) metrics included a minimum of 5 million reads per library,  $\geq 100$  reads per  
120 million (RPM) for the IC T1 and MS2 phages in the DNA and RNA libraries, respectively, and  
121 positive qualitative detection of each of the 7 microorganisms in the PC using pre-designated  
122 thresholds, as described below.

123

#### 124 **Evaluation of mNGS Analytical Performance Characteristics**

125 A detailed description of the methods used to evaluate mNGS analytical performance  
126 characteristics is provided in the **Supplemental Methods**. Briefly, limits of detection (LOD)  
127 were determined for each of the 7 representative organisms in the PC by analyzing a series of  
128 10-fold dilutions for qualitative detection. The LOD was determined using probit analysis,  
129 defined as the concentration at which 95% of replicates would be detected, with at least 3  
130 replicates performed for concentrations above and below this level. Precision was determined  
131 using repeat analysis of the PC and NTC over 20 consecutive sequencing runs (inter-assay  
132 reproducibility) and 3 sets of separately PC and NTC controls processed in parallel on the same  
133 run (intra-assay reproducibility). Test stability was determined using control samples held at

134 various temperatures and subject to multiple freeze/thaw cycles. Interference was determined  
135 using PC spiked with known amounts of human DNA or RNA material. Results were assessed  
136 for qualitative detection of organisms in the PC.

137 Accuracy was determined using 95 clinical CSF samples (**Supplemental Figure S1**),  
138 with up to 5 potential result categories per sample (RNA virus, DNA virus, bacteria, fungus and  
139 parasite). Samples were obtained from patients at University of California, San Francisco  
140 (UCSF) (n=59), Children's National Medical Center (n=19), Children's Hospital Colorado  
141 (CHCO) (n=1), and Quest Diagnostics (n=16). Due to the varying number of clinical tests  
142 performed per sample and limited residual CSF volume, we generated 3 composite reference  
143 standards for purposes of comparison. The first composite standard consisted of the original  
144 conventional clinical test results (both positive and negative) available prior to mNGS analysis,  
145 providing an assessment of mNGS sensitivity and specificity relative to clinical testing. If mNGS  
146 detected an organism that had not been tested for clinically, the result was considered  
147 "reference untested", and that result was excluded from the comparison. Negative mNGS  
148 results corresponding to a given category were also excluded if no clinical testing for pathogens  
149 within that category had been performed. A second composite standard consisted of combined  
150 results from the original clinical testing and additional molecular testing of CSF samples (volume  
151 permitting), either when clinical and mNGS results were discrepant (n=8) or when mNGS  
152 detected an organism that had not been included in the original testing (n=10). Finally, a third  
153 composite standard was generated, which excluded samples with high human sequence  
154 background (n=26), defined as samples with phage IC sequence recovery below a pre-  
155 designated 100 RPM threshold. The second and third comparisons are described as positive  
156 percent agreement (PPA) and negative percent agreement (NPA), as selective discrepancy  
157 testing can bias estimates of test sensitivity and specificity (Meiser 2002). To evaluate mNGS  
158 detection performance for additional organism types not readily available from clinical CSF  
159 samples, the accuracy study also included contrived samples of 5 known organisms (*N.*

160 *meningitidis*, *S. agalactiae*, *C. albicans*, *M. fortuitum*, *M. abscessus*) spiked into negative CSF at  
161 defined concentrations.

162

### 163 **Challenge study**

164 The Aseptic Meningitis and Encephalitis Study (AMES) is a prospective cohort study  
165 enrolling children presenting to CHCO with culture-negative meningitis and encephalitis since  
166 2012. Ethical approval for the study was obtained from the Colorado Multiple Institutional  
167 Review Board (protocol #12-0745), and all subjects provided informed consent for specimen  
168 collection and testing. A subset of CSF specimens (n=20) with sufficient residual volume (600  
169 uL) from subjects with known and unknown etiologies was coded for mNGS testing as a  
170 challenge set. Samples were processed in a blinded fashion at UCSF, and results discussed in  
171 clinical context with site investigators at CHCO over web-based teleconferencing. Results from  
172 the mNGS assay and conventional clinical testing were compared for up to 5 result categories  
173 (RNA virus, DNA virus, bacterium, fungus, and parasite) per sample.

174

### 175 **Accession numbers**

176 Microbial sequences with human reads removed have been deposited in the NCBI  
177 Sequence Read Archive (BioProject accession number PRJNA234047). Sequences  
178 corresponding to the HIV-1 and CMV controls in the PC and the MS2 (RNA) phage and T1  
179 (DNA) phage spiked IC samples have been deposited in GenBank (accession numbers  
180 pending).

181

## 182 **RESULTS**

### 183 **Sample processing and bioinformatics analysis**

184 We developed an mNGS assay for pathogen identification from CSF consisting of library  
185 preparation, sequencing, and bioinformatics analysis for pathogen detection (**Figure 1**), and  
186 validated the performance of the assay in a CLIA-certified laboratory. Wet bench protocols and  
187 sequencing runs for the study were performed by state-licensed clinical laboratory scientists.  
188 For each sequencing run, NTC (“no template” control), PC (positive control), and up to 8 patient  
189 CSF samples were processed by DNA/RNA enrichment, nucleic acid extraction, construction of  
190 DNA and RNA libraries, and sequencing on an Illumina HiSeq instrument in rapid run mode,  
191 targeting a total of 5 to 20 million sequences per library (**Figure 1A and B**). Raw mNGS  
192 sequence data were analyzed using SURPI+, a bioinformatics analysis pipeline for pathogen  
193 identification from mNGS sequence data (Naccache et al. 2014) that was modified for clinical  
194 use. Specifically, the SURPI+ pipeline included filtering algorithms for exclusion of false-  
195 positive hits from database misannotations, taxonomic classification for accurate species-level  
196 identification, automated report generation implementing *a priori* established thresholds for  
197 pathogen detection, and a web-based graphical user interface to facilitate laboratory director  
198 review and confirmation of mNGS findings (**Figures 1C and Supplemental Figure S2**).

199

### 200 **Establishing thresholds for reporting detected pathogens**

201 To minimize the potential for false positive results from low-level background  
202 contamination, threshold criteria were established for organism detection (**Figure 1C**). For  
203 viruses, we developed threshold criteria based on the detection of nonoverlapping reads from at  
204 least 3 distinct genomic regions, taking into consideration viruses incidentally detected in the  
205 NTC sample that were potential background contaminants. Viruses comprising known flora,  
206 such as anelloviruses and papillomaviruses, or laboratory reagent contaminants, such as  
207 murine gammaretroviruses, were not reported. For identification of bacteria, fungi, and  
208 parasites, we developed a reads per million (RPM) ratio metric, or RPM-r, defined as  $RPM-r =$   
209  $RPM_{\text{sample}} / RPM_{\text{NTC}}$  (with the minimum  $RPM_{\text{NTC}}$  set to 1). This metric accounted for background



210 contamination by normalizing the RPM of detected pathogen reads assigned to a given  
211 taxonomic classification (family, genus, or species) with respect to the RPM in the NTC. To  
212 determine the optimal threshold value for RPM-r, we plotted receiver operating characteristic  
213 (ROC) curves at varying ratios corresponding to mNGS analysis of 95 clinical CSF samples that  
214 were included in the accuracy evaluation (**Supplemental Figure S3**; also see below). The  
215 ROC curve analysis showed that an RPM-r of 10 maximized accuracy for organism detection.  
216 Thus, we designated a minimum threshold of 10 RPM-r for reporting the detection of a  
217 bacterium, fungus, or parasite. Occasionally, multiple bacterial genera ( $\geq 2$ ) from environmental  
218 and/or skin flora were detected in a CSF sample above the 10 RPM-r threshold, and attributed  
219 to contamination. In these cases (n=7), mNGS results were reported as “multiple bacterial  
220 genera detected” (with an interpretive comment indicating likely sample contamination), and  
221 were considered as negative for bacterial detection by mNGS.

222

### 223 **Limits of detection**

224 To calculate the 95% limits of detection (LOD), defined as the lowest concentration at  
225 which 95% of positive samples are detected, multiple replicates of the PC at serial dilutions near  
226 the estimated detection limit were tested by mNGS. Using probit analysis, a 95% limit of  
227 detection was determined for each of the 7 representative organisms in the PC (**Table 1**). The  
228 final working PC consisted of the 7 organisms spiked at concentrations ranging from 0.5-2 log  
229 above the 95% limit of detection. A linear correlation was observed between the input  
230 concentration and number of reads / genome coverage for viruses ( $R^2$  values 0.9083-0.9911),  
231 and between the input concentration and RPM-r for bacteria, fungi, and parasites ( $R^2$  values  
232 .09856-.09996) (**Supplemental Figure S4**).

233

### 234 **Precision**

235

236 We demonstrated inter-assay reproducibility by mNGS testing of the NTC and PC  
237 across 20 consecutive sequencing runs, and intra-assay reproducibility by testing of  
238 3 independently generated sets of NTC and PC on the same run. Internal spiked phage controls  
239 passed QC for every run, and only one PC RNA library (out of 46 total DNA and RNA libraries)  
240 had fewer than the minimum designated cutoff of 5 million reads. All 7 organisms were detected  
241 using pre-established threshold criteria for the intra-assay run and each replicate inter-assay run  
242 (**Table 1**).

243

#### 244 **Accuracy**

245 For evaluation of accuracy, a total of 95 CSF patient samples (73 positive and 22  
246 negative for a pathogen by conventional clinical testing) were tested using the mNGS assay.  
247 There were 5 categories of results for each sample, corresponding to 5 different pathogen types  
248 (bacteria, fungi, parasites, DNA viruses, and RNA viruses). mNGS results were compared to (1)  
249 original clinical test results, (2) results after discrepancy testing, and (3) results after  
250 discrepancy testing and exclusion of samples with high host background (**Table 1 and**  
251 **Supplemental Table S1**).

252 Overall, the mNGS assay showed 73% sensitivity and 99% specificity compared to  
253 original clinical test results. 21 mNGS results were considered false-negatives, including 4 RNA  
254 viruses (1 enterovirus and 3 West Nile virus (WNV) diagnosed by CSF serology), 4 DNA  
255 viruses (2 VZV, 1 HSV-2, 1 EBV, diagnosed by PCR), 9 bacteria (diagnosed by culture), and 4  
256 fungi (diagnosed by culture and/or antigen testing) (**Supplemental Table S1**). One mNGS  
257 result was considered to be false-positive for *Bacillus* sp. detection in a culture-negative CSF.  
258 All 5 organisms spiked into negative CSF matrix as part of the accuracy study were correctly  
259 detected (*N. meningitidis*, *S. agalactiae*, *C. albicans*, *M. fortuitum*, *M. abscessus*).

260 Discrepancy analysis using targeted clinical PCR was performed on 18 samples with  
261 sufficient volume available for testing. For organisms detected by mNGS but not tested for

262 clinically (n=10), discrepancy tests confirmed the mNGS results in all 10 cases (5 HIV, 1 CMV, 2  
263 EBV, 1 HSV, 1 HHV6). In 8 cases, mNGS results were initially considered to be false negatives  
264 but enough sample was available for discrepancy testing using molecular methods. Overall,  
265 discrepancy testing using molecular testing failed to detect the causative organism in 5 of the 8  
266 cases with negative mNGS results. Two cases of WNV diagnosed by positive CSF IgM serology  
267 (1 case also had cross-reactive IgM antibodies to Japanese Encephalitis Virus (JEV) in blood)  
268 were negative by WNV PCR testing, concordant with the mNGS results. Two culture-positive  
269 bacterial cases with negative mNGS results underwent orthogonal testing using 16S rRNA  
270 bacterial PCR, and one was not detected (*P. mirabilis*), whereas one was positive (*E.*  
271 *galinarum*). Four culture-positive samples with negative mNGS results for fungi were tested  
272 using 18S internal transcribed spacer (ITS) PCR, and 2 were negative (*C. parapsilosis* and *C.*  
273 *neoformans*) whereas the other 2 were positive (*A. fumigatus* and *S. schenckii*).

274       Among the 3 remaining *bona fide* false-negative mNGS cases (*E. galinarum*, *A.*  
275 *fumigatus*, and *S. schenckii*), the first 2 cases were only weakly positive by original clinical testing  
276 (the *E. galinarum* grew from broth only, whereas the *A. fumigatus* was galactomannan-positive  
277 and fungal culture negative). Both were also high-background samples (**Supplemental Table**  
278 **S1**), and thus the number of identified pathogen reads did not meet thresholds for reporting. The  
279 third case (*S. schenckii*) was likely missed by mNGS testing because the ~32 Mb genome of *S.*  
280 *schlenckii*, while publicly available (Cuomo et al. 2014), is not part of the GenBank NT reference  
281 database used by the SURPI+ computational pipeline. This resulted in only 33 reads in the  
282 sample (RPM-r 1.93) being identified as *S. schenckii*, also below reporting thresholds. Adjusting  
283 the results comparison on the basis of the discrepancy testing results yielded 81% positive  
284 percent agreement and 99% negative percent agreement for the mNGS assay relative to  
285 combined original and discrepancy testing results.

286       There were additional incidental organism detections by mNGS (n=12) where sample  
287 volume was insufficient to perform confirmatory molecular testing. These included HIV (n=4),

288 WNV (n=1), rotavirus (n=1), rhinovirus (n=1), HCV (n=1), parvovirus B19 (n=2), human  
289 herpesvirus 7 (n=1) and *Bacillus* spp. (n=1). With the exception of *Bacillus* spp. which might  
290 have been recovered in CSF cultures, the presence of these organisms could not be  
291 independently confirmed by molecular testing and thus these mNGS results were excluded from  
292 the comparisons, as it could not be determined whether a given additional detection was a true  
293 or false positive.

294 A third comparison was performed after exclusion of results from CSF samples with an  
295 IC RPM of <100, indicating potential decreased sensitivity for the mNGS assay due to high  
296 human host background (see “Interference”, below). A total of 26 samples had high background  
297 (1 RNA virus, 3 DNA virus, 19 bacteria, 2 fungi, 1 negative), and exclusion of these yielded 91%  
298 positive percent agreement and 99% negative percent agreement for the mNGS assay overall.  
299 Notably, the 19 bacterial samples with high background comprised 70.4% of the total number of  
300 culture-positive bacterial cases (n=27), consistent with the relatively high leukocyte levels seen  
301 in typical cases of bacterial meningitis.

302

### 303 **Interference**

304 We evaluated the effects of interference with human DNA and RNA, red blood cell  
305 hemolysis, and mixtures of related species in the same genus (*Staphylococcus aureus* and  
306 *Staphylococcus epidermidis*) on mNGS assay performance (**Table 1**). Addition of human DNA  
307 at a level equivalent to  $1 \times 10^6$  cells/mL resulted in complete failure to detect spiked DNA  
308 pathogens in the PC, whereas addition of exogenous RNA and DNA at lower levels ( $\leq 1 \times 10^4$   
309 cells/mL) did not impact qualitative detection. The number of sequenced IC phage reads was  
310 found to be linearly correlated with the amount of added exogenous DNA ( $R^2 = 0.999$ ). Based  
311 on the interference results, an RPM threshold of 100 was chosen for the IC phage reads, with  
312 RPM values below this level indicating that the sample had high human DNA and/or RNA  
313 background (**Supplemental Figure S5**). For mNGS reporting, these high-background samples

314 included a comment that the assay had decreased sensitivity for detection of RNA viruses (from  
315 RNA libraries) or DNA viruses, bacteria, fungi and parasites (from DNA libraries).

316 Available data from 55 CSF samples in the accuracy study with recorded white blood  
317 cell (WBC) counts were used to evaluate the effect of WBC count, related to the amount of  
318 human nucleic acid background, on recovery of IC phage sequences. Among 26 samples with  
319 IC DNA phage counts of <100 RPM, indicating high human background, the average WBC was  
320 5,896 cells/mm<sup>3</sup>, while 29 samples with IC counts of >100 RPM had an average WBC count of  
321 27 cells/mm<sup>3</sup> (p = 0.0498 by two-tailed t-test).

322 Gross hemolysis (dark red CSF) resulted in decreased sensitivity for RNA virus  
323 detection (HIV-1 in the PC) by mNGS, but did not affect detection sensitivity for DNA pathogens.  
324 Moderate to low levels of hemolysis (pink to light red CSF) did not affect detect sensitivity for  
325 any of the PC organisms. Analysis of spiked samples containing *S. aureus* and *S. epidermidis*  
326 with equivalent RPM-r values at baseline demonstrated accurate discrimination of species  
327 within the same genus when mixed at 1:1, 4:1, and 1:4 ratios, as both species were correctly  
328 identified and calculated RPM-r values were within 7% of that expected on the basis of the  
329 spiked amounts.

330

### 331 **Stability**

332 Analysis of replicates of the PC held at 4°C for 0, 2, 5, and 6 days and subjected to 3  
333 freeze-thaw cycles demonstrated detection of all organisms (**Table 1**).

334

### 335 **Challenge study**

336 We blindly evaluated the performance of the mNGS assay on a set of 20 prospectively  
337 collected CSF samples from pediatric patients hospitalized at CHCO with meningitis,  
338 encephalitis, and/or myelitis (**Supplemental Table S2**). Comparison of the results assembled  
339 from each of the 5 organism categories yielded a sensitivity of 92% and specificity of 96% for

340 mNGS testing relative to conventional microbiological testing of CSF (culture, PCR, antigen,  
341 and serological testing). The assay correctly identified the causative pathogen in 11 of 12 cases  
342 that were previously positive for direct organism detection or serology from CSF, including  
343 cases of enterovirus (n=8), HSV-1 (n=1), HIV-1 (n=1) and WNV (n=1) in a patient with positive  
344 IgM serology from CSF. The mNGS assay failed to detect WNV in a second patient with  
345 positive CSF IgM serology. Three additional organisms (*Enterobacter sp.*, *Corynebacterium sp.*,  
346 and EBV) were detected by mNGS, each from a different sample. The detection of *Enterobacter*  
347 *sp.* and *Corynebacterium sp.* were considered to be mNGS false-positives, since the samples  
348 had previously tested negative by culture. mNGS also identified EBV in a CSF sample from a  
349 patient with positive testing for EBV IgG antibodies in blood; this finding was excluded from the  
350 comparison due to the lack of confirmatory testing from CSF. In addition, mNGS failed to detect  
351 organisms in 4 cases: 1 case of *Borrelia burgdorferi* diagnosed using peripheral blood serology  
352 only, 2 cases of presumptive *Mycoplasma* encephalitis with PCR-positive respiratory but not  
353 CSF samples, and 1 case of presumptive enterovirus 71 infection with a positive viral culture  
354 from rectal swab but negative CSF PCR. Since the diagnoses in these 4 cases were not made  
355 directly from CSF, these results were also excluded from the comparison. Negative mNGS  
356 testing in 4 undiagnosed cases was concordant with negative conventional microbiological  
357 testing, including 1 case of culture-negative, presumptive bacterial meningitis and 3 cases of  
358 idiopathic encephalitis.

359

## 360 **DISCUSSION**

361 Here we developed and validated a clinical mNGS assay intended to diagnose infectious  
362 etiologies of meningitis, encephalitis, and myelitis from CSF, followed by blinded evaluation of  
363 mNGS performance using a set of 20 prospectively collected CSF samples from pediatric  
364 patients admitted to a tertiary care hospital. As CSF is considered a normally sterile site, we

365 postulated that mNGS data generated from testing of this body fluid type would be more  
366 straightforward to interpret than data from more “environmental” samples such as respiratory  
367 secretions and stool. However, numerous challenges had to be overcome for successful  
368 implementation of mNGS in the clinical laboratory. First, a universal sequencing library  
369 preparation protocol was required that was robust across the wide range of potential nucleic  
370 acid concentrations in patient CSF ( $0 - 10^8$  cells/mm<sup>3</sup>). This ultimately required a protocol  
371 incorporating two PCR steps, an initial step for library amplification and a recovery amplification  
372 step to ensure robust library construction from relatively acellular CSF samples or the NTC  
373 buffer control, both containing little to no human host background. Second, the mNGS assay  
374 had to be capable of simultaneously detecting a broad spectrum of pathogens, including viruses  
375 (both single- and double-stranded RNA and DNA genomes), bacteria, fungi, and parasites.  
376 Thus, the mNGS protocol incorporated (1) a bead-beating step for lysis of microbial cell walls,  
377 (2) separate construction of RNA and DNA libraries from nucleic acid extracts for detection of  
378 RNA viruses and DNA pathogens, respectively, and (3) bioinformatics analysis using the  
379 entirety of NCBI GenBank NT database as a comprehensive reference database. Finally,  
380 reproducible threshold metrics needed to be developed and evaluated using ROC curve  
381 analysis to enable correct identification of pathogens from mNGS data above background noise.

382 We developed quality control materials and metrics for the CSF mNGS assay, including  
383 acceptable criteria for the performance of external positive and negative controls, as well as  
384 spiked internal controls. Given the untargeted nature of mNGS, a key limitation of the approach  
385 for infectious disease diagnostics is background interference, generally from human host DNA.  
386 The use of a spiked phage IC was found to be useful for assessing whether high background  
387 was present, indicating decreased sensitivity of pathogen detection by mNGS (Schlaberg et al.  
388 2017a). Overall, 27.4% of DNA libraries and 6.3% of RNA libraries in the accuracy study had  
389 fewer than 100 RPM IC phage reads recovered, making background interference a fairly



390 common limitation. Thus, in high background samples, negative mNGS findings may be less  
391 useful for excluding infection, and other diagnostic tests that may be less sensitive to  
392 background should be considered, such as 16S rRNA bacterial PCR (Salipante et al. 2013) and  
393 ITS fungal PCR (Pryce et al. 2006). This is especially relevant in cases of bacterial meningitis  
394 with high leukocyte counts in CSF. However, despite this limitation, mNGS was still able to  
395 detect bacterial pathogens in 12 of 19 culture-positive samples in the accuracy study with high  
396 host background.

397         The overall accuracy of the mNGS assay for pathogen detection over 5 categories of  
398 microorganisms as compared to initial conventional microbiological testing was 90%, with 73%  
399 sensitivity and 99% specificity. Positive percent agreement rose to 81% after discrepancy  
400 testing of samples with sufficient volume, and exclusion of samples with high host background  
401 increased this further to 91%. Only a fraction of all possible diagnostic tests for pathogens are  
402 performed in clinical microbiology laboratories given limited CSF sample volume. Thus, we  
403 decided to exclude organism detections by mNGS for which independent testing had not been  
404 performed in assessment of initial test performance (n=22), as no reference result was  
405 available. However, in 10 cases with sufficient CSF volume for orthogonal confirmatory testing,  
406 all 10 were found to be analytical true positives. Furthermore, in 5 of 8 (62.5%) cases where  
407 mNGS failed to detect an organism that was found with initial clinical testing (using culture  
408 and/or serology), confirmatory orthogonal PCR testing for this organism was negative, indicating  
409 that the sample may have degraded over time or that the original clinical result may have been  
410 incorrect.

411         As with any diagnostic assay, mNGS testing is prone to contamination. There is the  
412 potential to detect colonizing organisms that constitute normal human body flora (e.g.  
413 anelloviruses in CSF and blood (Maggi and Bendinelli 2010; Moustafa et al. 2017)), as well as  
414 exogenous (Strong et al. 2014) or cross-contamination. Often, the identity of the species



415 detected can provide clues as to the contamination source such as skin flora (e.g. *S.*  
416 *epidermidis*, papillomaviruses), laboratory reagents (murine gammaretroviruses, *E. coli*, insect  
417 viruses), body flora (e.g. anelloviruses), or environmental flora (e.g. *Thermus sp.*, *Bacillus sp.*).  
418 Cross-contamination in particular is a major concern given that the mNGS protocol involves  
419 PCR amplification. Strict processing controls to minimize contamination are essential and  
420 include unidirectional workflow, positive pressure ventilation in pre-amplification areas, and  
421 workspace separation for different assay steps. New reagent lots must undergo QC testing with  
422 mNGS of a reference standard, such as a previously run sample, before reagents can be put  
423 into clinical use. Background contamination is also continually monitored by keeping track of  
424 contaminants seen in the NTC or PC, and conservative threshold criteria are used to minimize  
425 the reporting of false-positive results. Additionally, periodic swipe tests of instruments and lab  
426 sources followed by mNGS of the swabs can facilitate targeted cleaning to ensure absence of  
427 laboratory contamination. However, despite use of contamination controls for the mNGS assay,  
428 7.4% of clinical samples in the accuracy study had multiple bacteria genera detected above  
429 thresholds, generally consisting of environmental or skin flora. Rarely are bacterial co-infections  
430 causative for cases of meningitis / encephalitis (with the possible exception of brain abscesses  
431 communicating with CSF), so these findings were noted as indicating probable sample  
432 contamination, and were considered as negative for bacterial pathogen detection in this  
433 analysis. It is likely that bacterial DNA is introduced from *bona fide* uncultivable organisms  
434 during sample collection or via reagents / tubes that are sterile but not DNA-free, and mNGS  
435 analysis and interpretation must be able to deal with these contamination risks.

436         The challenge study demonstrated that mNGS detected the same organism identified  
437 through conventional direct organism detection methods or serology from CSF in 11 of 12  
438 (91.7%) of cases. One case of WNV, diagnosed serologically, was missed by mNGS (false-  
439 negative). There were 2 mNGS false-positives (*Corynebacterium sp.* and *Enterobacter sp.*),  
440 likely due to contamination introduced during sample collection, handling, or the assay

441 procedure. mNGS of CSF failed to identify the pathogen in 4 patients who had a presumptive  
442 infectious diagnosis from peripheral microbiological testing (serology, culture, and/or PCR) done  
443 from sites other than CSF. We found that the sensitivity of mNGS is critically dependent on  
444 whether the organism (or nucleic acid from the organism) is present at the time of sample  
445 collection. It is thus not unexpected that mNGS testing missed a number of infections that are  
446 most often diagnosed by serology because the pathogen is absent or only transiently present in  
447 CSF (e.g. neurosyphilis, Lyme neuroborreliosis, and WNV). For these cases, direct detection  
448 testing approaches such as PCR and mNGS may be inappropriate and there should be a low  
449 threshold for ordering antibody-based serologic testing or performing microbial analysis from  
450 other body sites to establish the diagnosis if there is clinical suspicion (Debiasi and Tyler 2004).

451 While mNGS testing can provide broad-spectrum pathogen identification, assessment of  
452 the clinical significance of the findings requires interpretation. Thus, mNGS results are  
453 submitted to the patient electronic medical record as an interpretive report by pathologists with  
454 expertise in microbiology and genomics, after reviewing and citing of relevant literature. In  
455 addition to the submitted report, direct discussion or teleconferences can also be set up  
456 between pathologists and providers to clarify and review mNGS results in clinical context. These  
457 forums can also be used to communicate results of supplementary analyses of mNGS data,  
458 including (1) genome assembly for characterization of predicted antibiotic or antiviral resistance  
459 mutations, (2) phylogenetic analysis for genotyping and strain-level identification, and (3)  
460 disclosure of reads from potential pathogens below formal reporting thresholds. Our finding of a  
461 linear correlation between the number of reads or genome coverage and pathogen titer (as  
462 previously noted for influenza virus in nasal swabs (Greninger et al. 2010)) also raises the  
463 prospect of extracting quantitative information from metagenomic sequence data. The  
464 metagenomic analyses performed here were facilitated by the use of SURPI+ software, as it  
465 provides summaries and graphical visualization tools tailored for evaluation and reporting of  
466 mNGS results. Thus, the clinical relevance of mNGS findings can be efficiently communicated

467 to physicians, potentially informing the next steps in diagnosis, management, and treatment of  
468 the patient, and may also prove informative for public health surveillance and outbreak  
469 investigation (Chiu et al. 2017).

470

| Performance Metric                           | Method                                                                                    | Results                         |                                                                                                                                                        |      |                                                        |     |                                                        |     |  |
|----------------------------------------------|-------------------------------------------------------------------------------------------|---------------------------------|--------------------------------------------------------------------------------------------------------------------------------------------------------|------|--------------------------------------------------------|-----|--------------------------------------------------------|-----|--|
| <b>Limits of Detection (LoD)<sup>a</sup></b> | Qualitative detection of PC dilution replicates by probit analysis                        |                                 |                                                                                                                                                        |      |                                                        |     |                                                        |     |  |
|                                              | Pathogen type                                                                             | Representative organism         | LoD                                                                                                                                                    |      |                                                        |     |                                                        |     |  |
|                                              | DNA virus                                                                                 | CMV                             | 14 copies/mL                                                                                                                                           |      |                                                        |     |                                                        |     |  |
|                                              | RNA virus                                                                                 | HIV                             | 313 copies/mL                                                                                                                                          |      |                                                        |     |                                                        |     |  |
|                                              | Bacterium, gram-positive                                                                  | <i>Streptococcus agalactiae</i> | 10 CFU/mL                                                                                                                                              |      |                                                        |     |                                                        |     |  |
|                                              | Bacterium, gram-negative                                                                  | <i>Klebsiella pneumoniae</i>    | 8 CFU/mL                                                                                                                                               |      |                                                        |     |                                                        |     |  |
|                                              | Fungus, mold                                                                              | <i>Aspergillus niger</i>        | 220 CFU/mL                                                                                                                                             |      |                                                        |     |                                                        |     |  |
|                                              | Fungus, yeast                                                                             | <i>Cryptococcus neoformans</i>  | 0.2 CFU/mL                                                                                                                                             |      |                                                        |     |                                                        |     |  |
|                                              | Parasite                                                                                  | <i>Toxoplasma gondii</i>        | 81 organisms/mL                                                                                                                                        |      |                                                        |     |                                                        |     |  |
| <b>Precision<sup>a</sup></b>                 | Qualitative detection over 20 consecutive PC runs (intra-assay)                           | 100% concordance                |                                                                                                                                                        |      |                                                        |     |                                                        |     |  |
|                                              | Qualitative detection of 3 PC samples on the same run (inter-assay)                       | 100% concordance                |                                                                                                                                                        |      |                                                        |     |                                                        |     |  |
| <b>Stability<sup>a</sup></b>                 | Qualitative detection of PC held at 4°C for 0, 2, 5, and 6 days                           | 100% concordance                |                                                                                                                                                        |      |                                                        |     |                                                        |     |  |
|                                              | Qualitative detection of PC subjected to 1, 2, and 3 freeze-thaw cycles                   | 100% concordance                |                                                                                                                                                        |      |                                                        |     |                                                        |     |  |
| <b>Interference<sup>a</sup></b>              | Qualitative detection of PC with spiked DNA (low, medium, high concentration)             | DNA                             | All spiked ICs and PC organisms (DNA viruses, bacteria, fungi, parasites) detected above QC thresholds                                                 |      |                                                        |     |                                                        |     |  |
|                                              | Qualitative detection of PC with spiked RNA (low, medium, high concentration)             | RNA                             | All spiked ICs and PC organisms (RNA viruses) detected                                                                                                 |      |                                                        |     |                                                        |     |  |
|                                              | Qualitative detection of PC spiked with hemolytic blood (low, medium, high concentration) | DNA                             | All spiked ICs and PC organisms (DNA viruses, bacteria, fungi, parasites) detected except for hemolytic blood spiked into the PC at high concentration |      |                                                        |     |                                                        |     |  |
|                                              | Qualitative detection of PC spiked with hemolytic blood (low, medium, high concentration) | RNA                             | All spiked ICs and PC organisms (RNA viruses) detected                                                                                                 |      |                                                        |     |                                                        |     |  |
| <b>Accuracy</b>                              | 95 clinical CSF samples, results comparison                                               |                                 | Original clinical testing (n=216 results)                                                                                                              |      | After discrepancy testing (n=217 results) <sup>b</sup> |     | Excluding high background (n=168 results) <sup>c</sup> |     |  |
|                                              |                                                                                           | Pathogen type                   | Sens                                                                                                                                                   | Spec | PPA                                                    | NPA | PPA                                                    | NPA |  |
|                                              |                                                                                           | RNA virus                       | 67                                                                                                                                                     | 100  | 92                                                     | 100 | 91                                                     | 100 |  |
|                                              |                                                                                           | DNA virus                       | 85                                                                                                                                                     | 100  | 87                                                     | 100 | 93                                                     | 100 |  |
|                                              |                                                                                           | Bacterium                       | 64                                                                                                                                                     | 98   | 67                                                     | 98  | 80                                                     | 98  |  |
|                                              |                                                                                           | Fungus                          | 71                                                                                                                                                     | 100  | 83                                                     | 100 | 90                                                     | 100 |  |
|                                              |                                                                                           | Parasite                        | 100                                                                                                                                                    | 100  | 100                                                    | 100 | 100                                                    | 100 |  |
|                                              |                                                                                           | Overall                         | 73                                                                                                                                                     | 99   | 81                                                     | 99  | 91                                                     | 99  |  |

Abbreviations: PC, positive control mix of 7 representative organisms; IC, spiked internal control consisting of a DNA T1 phage and RNA M2 phage; mNGS, metagenomic next-generation sequencing; QC, quality control; Sens, sensitivity; Spec, specificity; PPA, positive percent agreement; NPA, negative percent agreement

<sup>a</sup> Pre-designated QC thresholds included >5 million reads per library, >100 RPM for the spiked ICs, >3 nonoverlapping gene regions for the viruses in the PC, and >10 RPM for the non-viral pathogens in the PC

<sup>b</sup> Discrepancy testing is performed on remaining CSF sample, if available, using molecular methods (i.e. PCR)

<sup>c</sup> High background is defined as samples with IC RPM <100

471  
472

**Table 1. Performance characteristics for the mNGS assay**

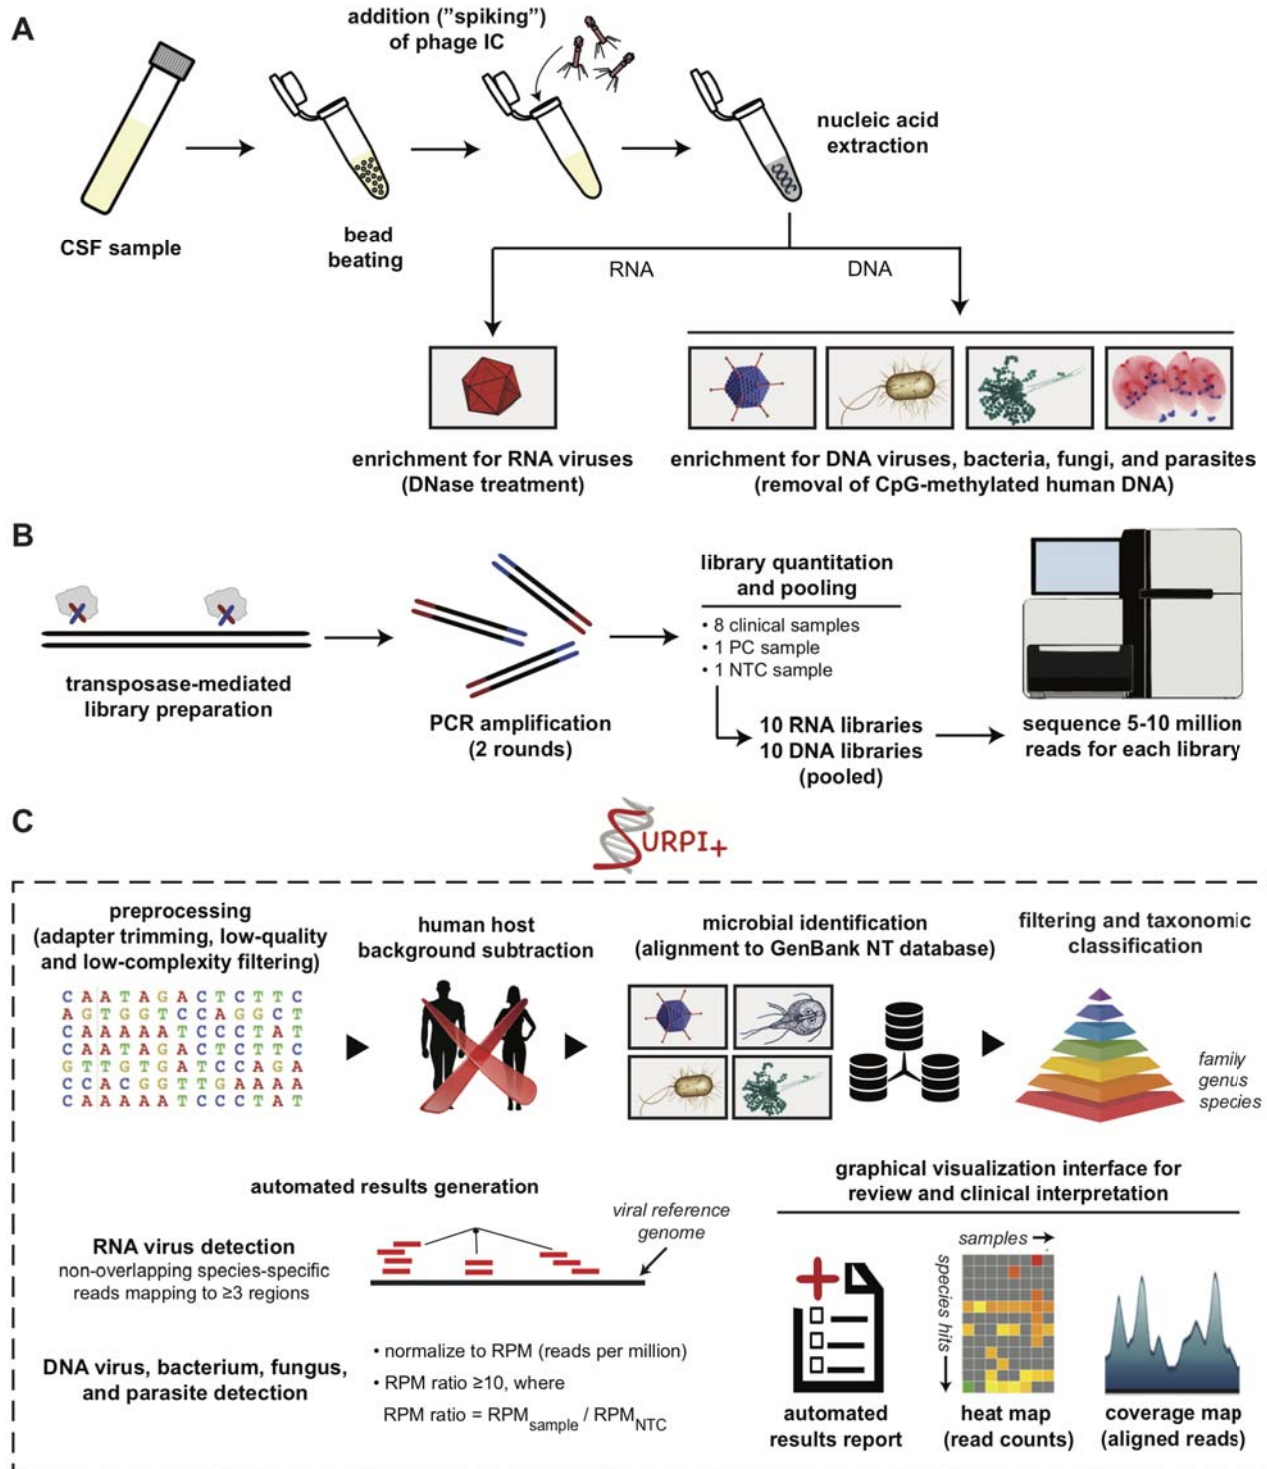

473

474 **Figure 1. Schematic of the mNGS Assay Workflow. (A)** CSF is extracted after lysis by bead-  
475 beating and internal control addition to allow viral, bacterial, fungal and parasite nucleic acid  
476 retrieval. Total nucleic acid extracts are enriched for pathogen DNA by removal of methylated  
477 DNA (DNA libraries) and treatment with DNase (RNA libraries). **(B)** Libraries are generated  
478 using the Nextera XT protocol and amplified using 2 rounds of PCR. Libraries are quantified,  
479 pooled, and loaded onto the sequencer. **(C)** Sequences are processed using SURPI+ software  
480 for alignment and classification. Reads are preprocessed by trimming of adapters and removal  
481 of low-quality / low-complexity sequences, followed by computational subtraction of human  
482 reads and taxonomic classification of remaining microbial reads to family, genus, or species. For  
483 viruses, reads are mapped to the closest matched genome to identify nonoverlapping regions;  
484 for bacteria, fungi, and parasites, a read per million (RPM) ratio (RPM-r) metric is calculated,  
485 defined as  $RPM-r = RPM_{\text{sample}} / NTC$ . To aid in analysis, result reports, heat maps of raw /  
486 normalized read counts, and coverage maps are automatically generated for use in review and  
487 clinical interpretation.

488

489 **COMPETING INTERESTS**

490 CYC is the director of the UCSF-Abbott Viral Diagnostics and Discovery Center (VDDC)  
491 and receives research support from Abbott Laboratories, Inc. CYC SA DS SF and SM are  
492 inventors on a patent application on algorithms related to SURPI+ software titled “Pathogen  
493 Detection using Next-Generation Sequencing”) (PCT/US/16/52912).

494

495 **AUTHOR CONTRIBUTIONS**

496 CYC SM ES and SNN developed the project. ES EP SA BF WL generated libraries.  
497 SNN SM SM CYC analyzed data for clinical validation. SF DS CYC developed SURPI+ software  
498 and graphical user interface for clinical use. WB modified the SNAP algorithm to facilitate  
499 taxonomic classification by SURPI+, SP banked CSF samples. BG JAL SD KM SM CYC  
500 provided clinical specimens. KM SD SM CYC JAL SNN SP CYC SM conducted chart review. DI  
501 BF SA conducted discrepancy testing. SM SNN and CYC wrote the manuscript with  
502 contributions from all authors.

503

504 **ACKNOWLEDGEMENTS**

505 We thank the staff of the Clinical Immunology lab for their help in discrepancy testing,  
506 and Gail Cunningham for her expert help in obtaining AFB organisms. We would also like to  
507 thank Brittany Goldberg for providing clinical samples for use in the validation.

508 This work is supported by NIH grants R01 HL105704 (CYC), a UC Center for  
509 Accelerated Innovation grant funded by NIH grants U54 HL119893 and NCATS UCSF-CTSI  
510 grant UL1 TR000004 (CYC), the California Initiative to Advance Precision Medicine (CYC and

511 SM), research support from Abbott Laboratories, Inc (CYC), and supplemental funding from the  
512 UCSF Medical Center (CYC and SM).

513

514



515 **REFERENCES**

- 516 Cazanave C, Greenwood-Quaintance KE, Hanssen AD, Karau MJ, Schmidt SM, Gomez Urena  
517 EO, Mandrekar JN, Osmon DR, Lough LE, Pritt BS et al. 2013. Rapid molecular  
518 microbiologic diagnosis of prosthetic joint infection. *J Clin Microbiol* **51**: 2280-2287.
- 519 Chiu C, Miller S. 2016. Next-Generation Sequencing. In *Molecular Microbiology: Diagnostic*  
520 *Principles and Practice, 3rd Edition*, (ed. DH Persing, et al.), pp. 68-79. ASM Press,  
521 Washington, DC.
- 522 Chiu CY, Coffey LL, Murkey J, Symmes K, Sample HA, Wilson MR, Naccache SN, Arevalo S,  
523 Somasekar S, Federman S et al. 2017. Diagnosis of Fatal Human Case of St. Louis  
524 Encephalitis Virus Infection by Metagenomic Sequencing, California, 2016. *Emerg Infect*  
525 *Dis* **23**: 1964-1968.
- 526 Cuomo CA, Rodriguez-Del Valle N, Perez-Sanchez L, Abouelleil A, Goldberg J, Young S, Zeng  
527 Q, Birren BW. 2014. Genome Sequence of the Pathogenic Fungus *Sporothrix schenckii*  
528 (ATCC 58251). *Genome Announc* **2**.
- 529 Debiasi RL, Tyler KL. 2004. Molecular methods for diagnosis of viral encephalitis. *Clin Microbiol*  
530 *Rev* **17**: 903-925, table of contents.
- 531 Fremont ML, Perot P, Muth E, Cros G, Dumarest M, Mahlaoui N, Seilhean D, Desguerre I,  
532 Hebert C, Corre-Catelin N et al. 2015. Next-Generation Sequencing for Diagnosis and  
533 Tailored Therapy: A Case Report of Astrovirus-Associated Progressive Encephalitis. *J*  
534 *Pediatric Infect Dis Soc* **4**: e53-57.
- 535 Glaser CA, Gilliam S, Schnurr D, Forghani B, Honarmand S, Khetsuriani N, Fischer M, Cossen  
536 CK, Anderson LJ, California Encephalitis P. 2003. In search of encephalitis etiologies:  
537 diagnostic challenges in the California Encephalitis Project, 1998-2000. *Clin Infect Dis*  
538 **36**: 731-742.
- 539 Glaser CA, Honarmand S, Anderson LJ, Schnurr DP, Forghani B, Cossen CK, Schuster FL,  
540 Christie LJ, Tureen JH. 2006. Beyond viruses: clinical profiles and etiologies associated  
541 with encephalitis. *Clin Infect Dis* **43**: 1565-1577.
- 542 Goldberg B, Sichtig H, Geyer C, Ledebor N, Weinstock GM. 2015. Making the Leap from  
543 Research Laboratory to Clinic: Challenges and Opportunities for Next-Generation  
544 Sequencing in Infectious Disease Diagnostics. *MBio* **6**: e01888-01815.
- 545 Granerod J, Ambrose HE, Davies NW, Clewley JP, Walsh AL, Morgan D, Cunningham R,  
546 Zuckerman M, Mutton KJ, Solomon T et al. 2010. Causes of encephalitis and differences  
547 in their clinical presentations in England: a multicentre, population-based prospective  
548 study. *Lancet Infect Dis* **10**: 835-844.
- 549 Greninger AL, Chen EC, Sittler T, Scheinerman A, Roubinian N, Yu G, Kim E, Pillai DR, Guyard  
550 C, Mazzulli T et al. 2010. A metagenomic analysis of pandemic influenza A (2009 H1N1)  
551 infection in patients from North America. *PLoS One* **5**: e13381.
- 552 Greninger AL, Messacar K, Dunnebacke T, Naccache SN, Federman S, Bouquet J, Mirsky D,  
553 Nomura Y, Yagi S, Glaser C et al. 2015. Clinical metagenomic identification of  
554 *Balamuthia mandrillaris* encephalitis and assembly of the draft genome: the continuing  
555 case for reference genome sequencing. *Genome Med* **7**: 113.
- 556 Khetsuriani N, Holman RC, Anderson LJ. 2002. Burden of encephalitis-associated  
557 hospitalizations in the United States, 1988-1997. *Clin Infect Dis* **35**: 175-182.
- 558 Maggi F, Bendinelli M. 2010. Human anelloviruses and the central nervous system. *Rev Med*  
559 *Viro* **20**: 392-407.
- 560 Meiser KL. 2002. Reporting results from studies evaluating diagnostic tests. In *Clinical*  
561 *Microbiology Newsletter*, Vol 24 (ed. FaD Administration), pp. 60-63. Elsevier, Inc.

- 562 Mongkolrattanothai K, Naccache SN, Bender JM, Samayoa E, Pham E, Yu G, Dien Bard J,  
563 Miller S, Aldrovandi G, Chiu CY. 2017. Neurobrucellosis: Unexpected Answer From  
564 Metagenomic Next-Generation Sequencing. *J Pediatric Infect Dis Soc* **6**: 393-398.
- 565 Moustafa A, Xie C, Kirkness E, Biggs W, Wong E, Turpaz Y, Bloom K, Delwart E, Nelson KE,  
566 Venter JC et al. 2017. The blood DNA virome in 8,000 humans. *PLoS Pathog* **13**:  
567 e1006292.
- 568 Naccache SN, Federman S, Veeraraghavan N, Zaharia M, Lee D, Samayoa E, Bouquet J,  
569 Greninger AL, Luk KC, Enge B et al. 2014. A cloud-compatible bioinformatics pipeline for  
570 ultrarapid pathogen identification from next-generation sequencing of clinical samples.  
571 *Genome Res* **24**: 1180-1192.
- 572 Naccache SN, Peggs KS, Mattes FM, Phadke R, Garson JA, Grant P, Samayoa E, Federman  
573 S, Miller S, Lunn MP et al. 2015. Diagnosis of neuroinvasive astrovirus infection in an  
574 immunocompromised adult with encephalitis by unbiased next-generation sequencing.  
575 *Clin Infect Dis* **60**: 919-923.
- 576 Parize P, Muth E, Richaud C, Gratigny M, Pilmis B, Lamamy A, Mainardi JL, Cheval J, de  
577 Visser L, Jagorel F et al. 2017. Untargeted next-generation sequencing-based first-line  
578 diagnosis of infection in immunocompromised adults: a multicentre, blinded, prospective  
579 study. *Clinical Microbiology and Infection* **23**.
- 580 Pryce TM, Palladino S, Price DM, Gardam DJ, Campbell PB, Christiansen KJ, Murray RJ. 2006.  
581 Rapid identification of fungal pathogens in BacT/ALERT, BACTEC, and BBL MGIT  
582 media using polymerase chain reaction and DNA sequencing of the internal transcribed  
583 spacer regions. *Diagn Microbiol Infect Dis* **54**: 289-297.
- 584 Salipante SJ, Sengupta DJ, Rosenthal C, Costa G, Spangler J, Sims EH, Jacobs MA, Miller SI,  
585 Hoogestraat DR, Cookson BT et al. 2013. Rapid 16S rRNA next-generation sequencing  
586 of polymicrobial clinical samples for diagnosis of complex bacterial infections. *PLoS One*  
587 **8**: e65226.
- 588 Salzberg SL, Breitwieser FP, Kumar A, Hao H, Burger P, Rodriguez FJ, Lim M, Quinones-  
589 Hinojosa A, Gallia GL, Tornheim JA et al. 2016. Next-generation sequencing in  
590 neuropathologic diagnosis of infections of the nervous system. *Neurol Neuroimmunol*  
591 *Neuroinflamm* **3**: e251.
- 592 Schlager R, Chiu CY, Miller S, Procop GW, Weinstock G, Professional Practice C, Committee  
593 on Laboratory Practices of the American Society for M, Microbiology Resource  
594 Committee of the College of American P. 2017a. Validation of Metagenomic Next-  
595 Generation Sequencing Tests for Universal Pathogen Detection. *Arch Pathol Lab Med*  
596 **141**: 776-786.
- 597 Schlager R, Queen K, Simmon K, Tardif K, Stockmann C, Flygare S, Kennedy B, Voelkerding  
598 K, Bramley A, Zhang J et al. 2017b. Viral Pathogen Detection by Metagenomics and  
599 Pan-Viral Group Polymerase Chain Reaction in Children With Pneumonia Lacking  
600 Identifiable Etiology. *J Infect Dis* **215**: 1407-1415.
- 601 Strong MJ, Xu G, Morici L, Splinter Bon-Durant S, Baddoo M, Lin Z, Fewell C, Taylor CM,  
602 Flemington EK. 2014. Microbial contamination in next generation sequencing:  
603 implications for sequence-based analysis of clinical samples. *PLoS Pathog* **10**:  
604 e1004437.
- 605 Washington JA. 1996. Principles of Diagnosis. In *Medical Microbiology, 4th edition*, (ed. S  
606 Baron). University of Texas Medical Branch at Galveston, Galveston, TX.
- 607 Wilson MR, Naccache SN, Samayoa E, Biagtan M, Bashir H, Yu G, Salamat SM, Somasekar S,  
608 Federman S, Miller S et al. 2014. Actionable diagnosis of neuroleptospirosis by next-  
609 generation sequencing. *N Engl J Med* **370**: 2408-2417.

610
